# Supplementary material for: Deletion of hippocampal Glucocorticoid receptors unveils sex-biased microRNA expression and neuronal morphology alterations in mice
Source: PubMed Central journal article supplement — Neurobiol Stress. 2021 Feb 9;14:100306. doi: 10.1016/j.ynstr.2021.100306 (PMC7906897; doi:10.1016/j.ynstr.2021.100306), 2021-02-09
Supplement: mmc6.pdf [file mmc6.pdf]

**mmu-miR-142-5p**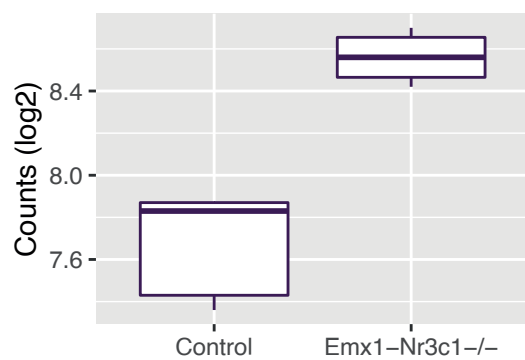**mmu-miR-200b**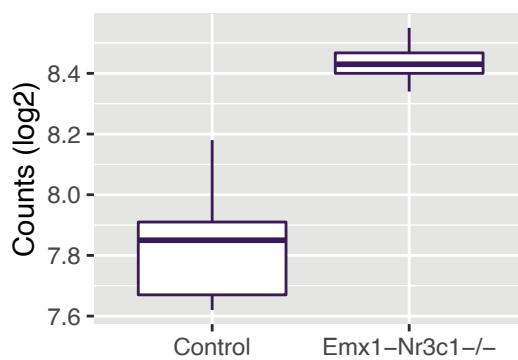**mmu-miR-136**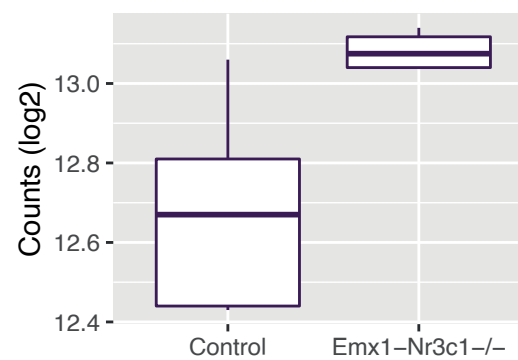**mmu-miR-322**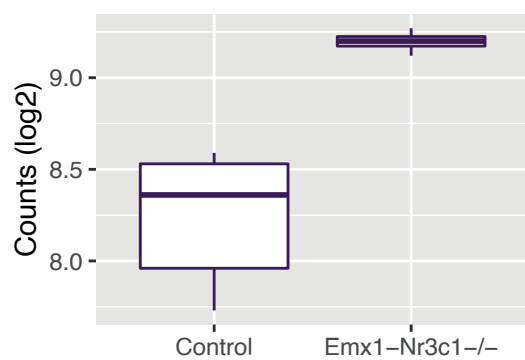**mmu-miR-1224**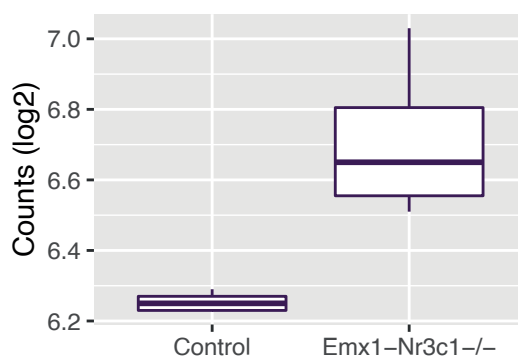**mmu-miR-1983**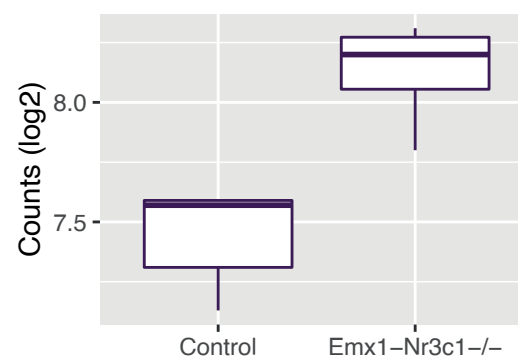**mmu-miR-669a**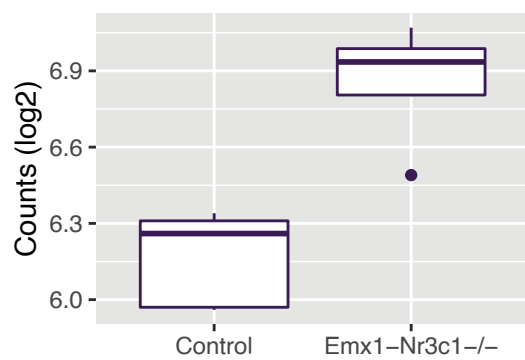**mmu-miR-301a**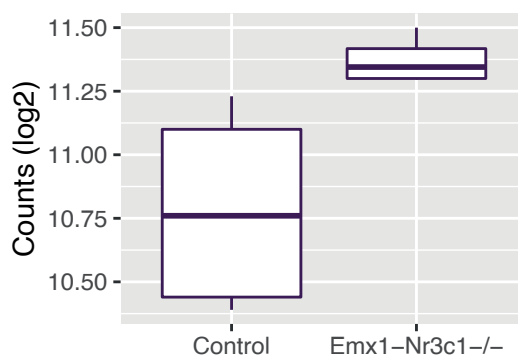**mmu-miR-99a**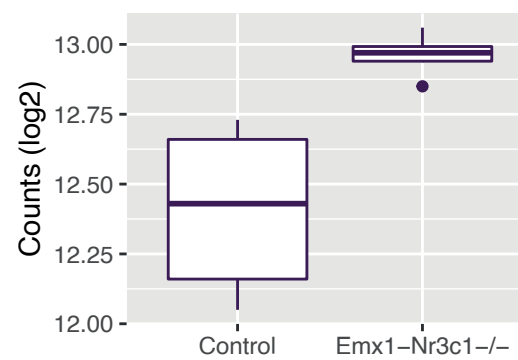**mmu-miR-1928**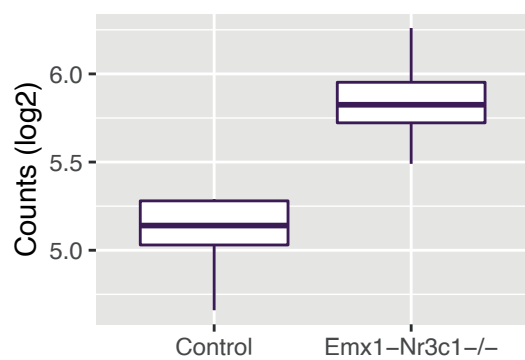**mmu-miR-674**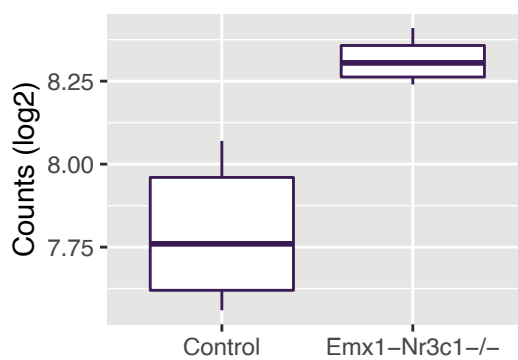**mmu-miR-378**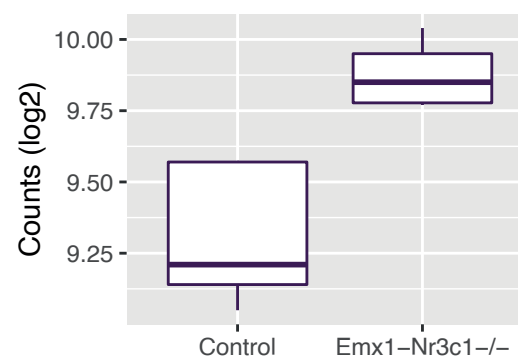**mmu-miR-1198**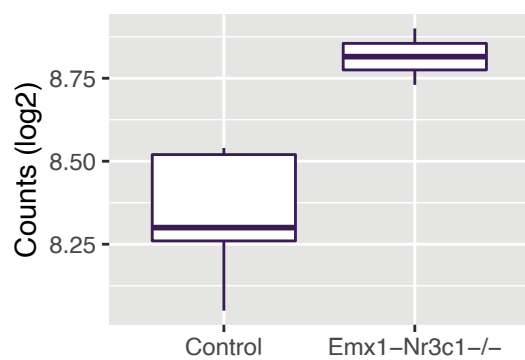**mmu-miR-181a**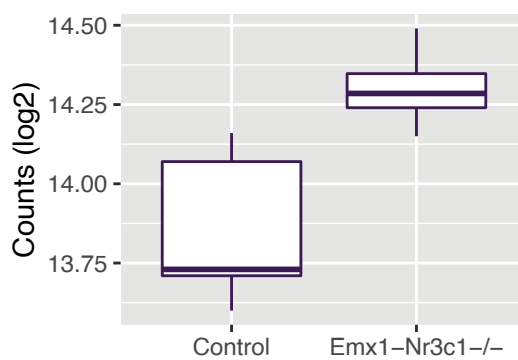**mmu-miR-409-5p**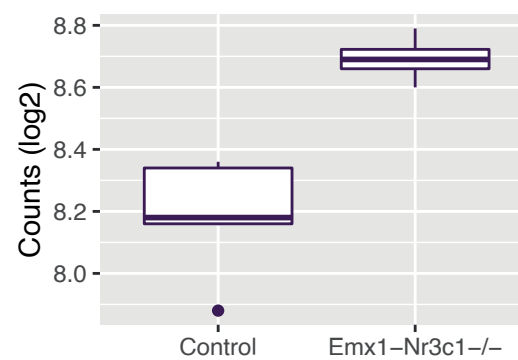

mmu-miR-676

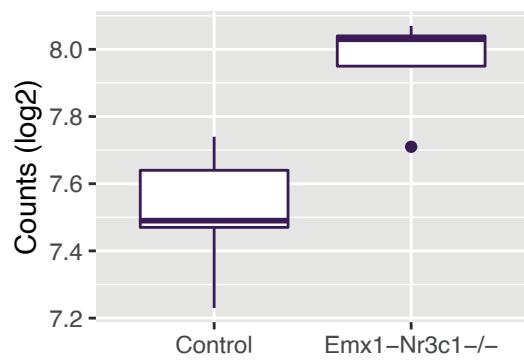

mmu-miR-150

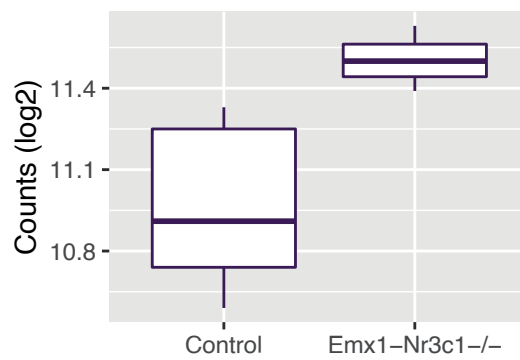

mmu-miR-200a

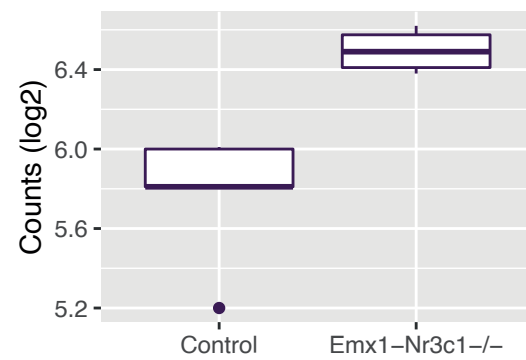

mmu-miR-3470a+mmu-miR-347

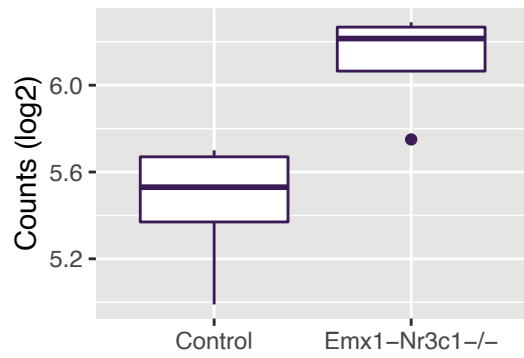

mmu-miR-130a

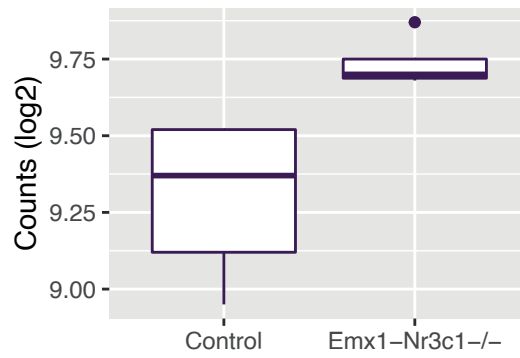

mmu-miR-7a

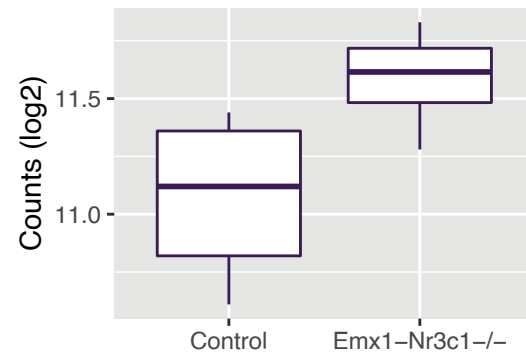

mmu-miR-1903

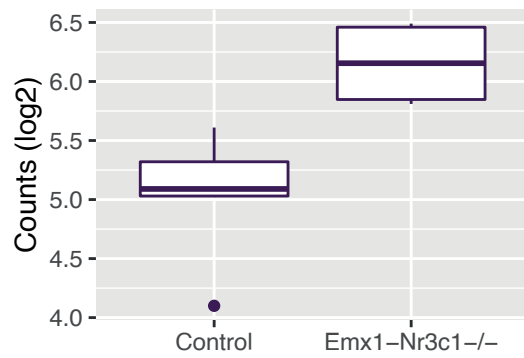

mmu-miR-27a

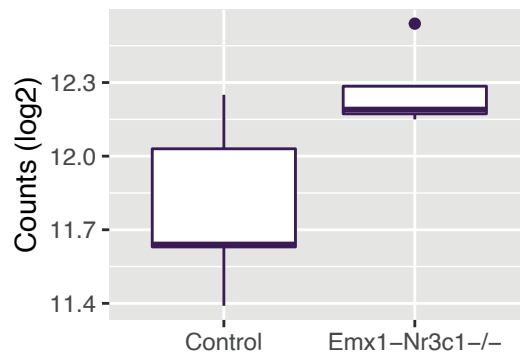

mmu-miR-1942

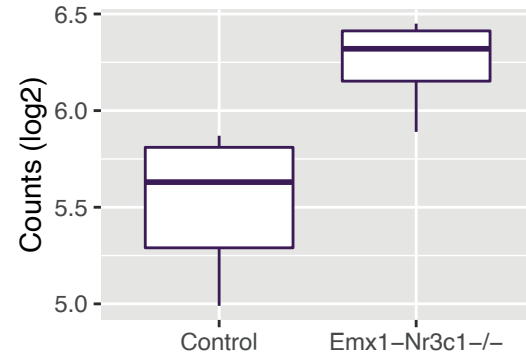

mmu-miR-542-5p

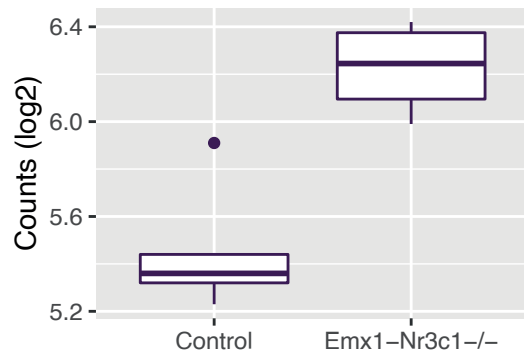

mmu-miR-411

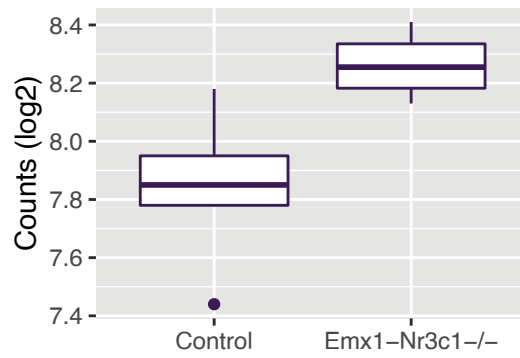

mmu-miR-875-5p

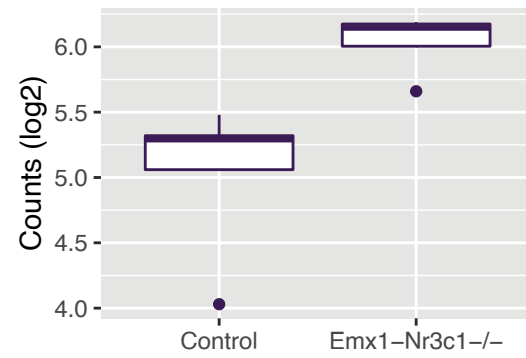

mmu-miR-201

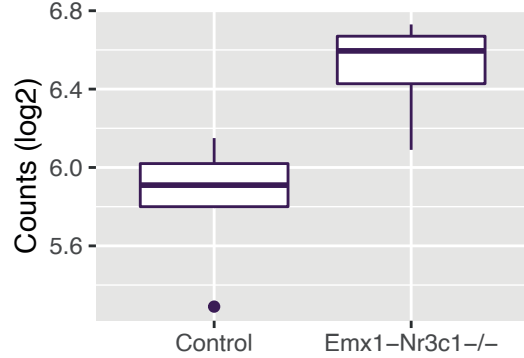

mmu-miR-23a

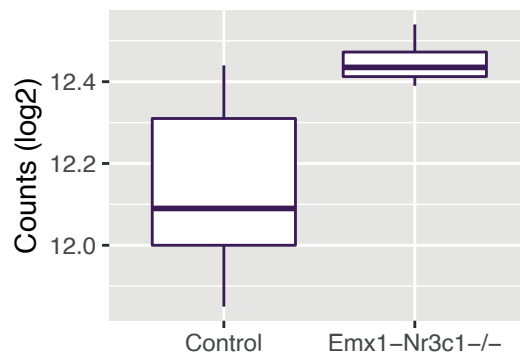

mmu-miR-425

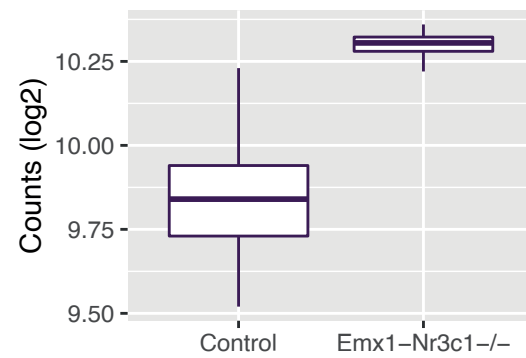

**mmu-miR-872**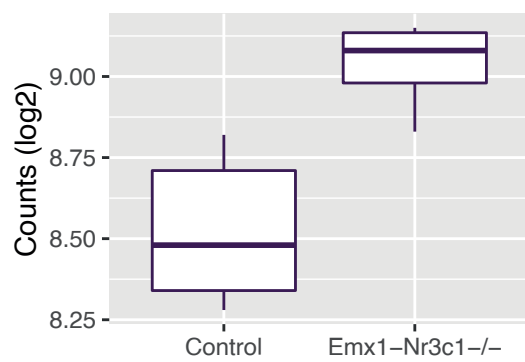**mmu-miR-369-5p**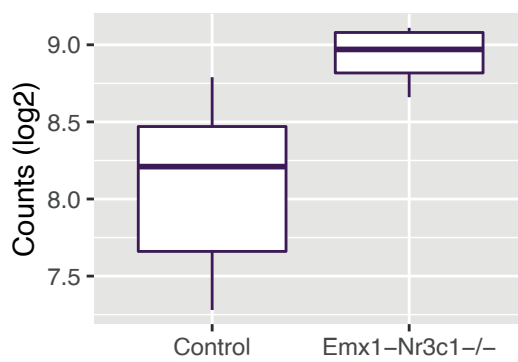**mmu-miR-320**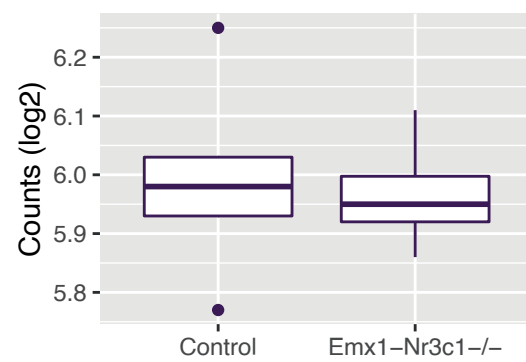**mmu-miR-126-5p**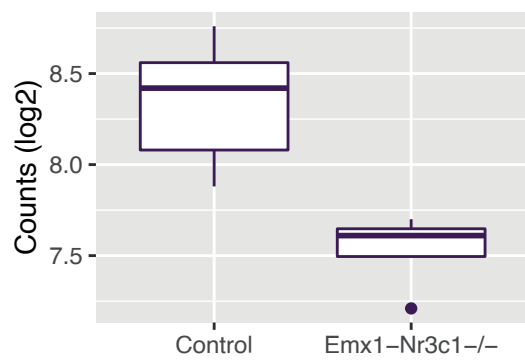**mmu-miR-219**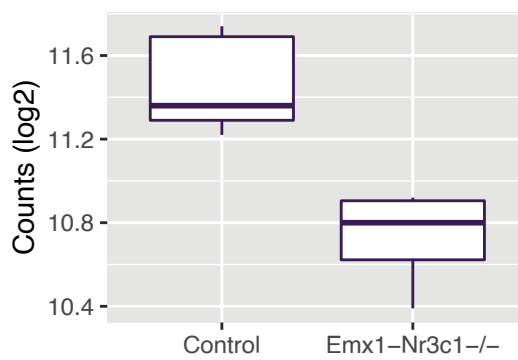**mmu-miR-532-3p**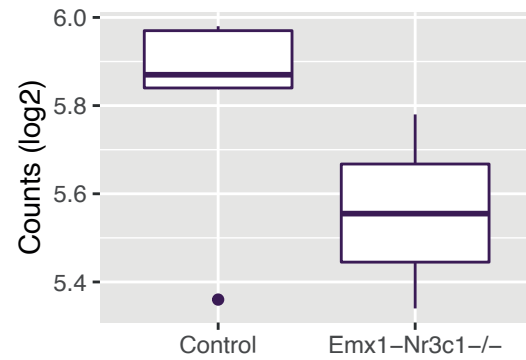**mmu-miR-26b**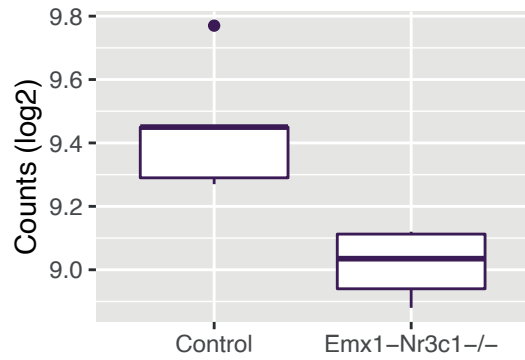**mmu-miR-488**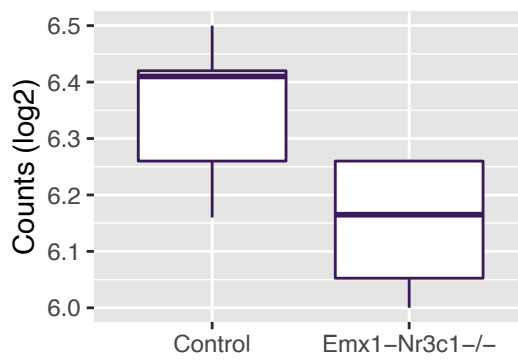**mmu-miR-3099**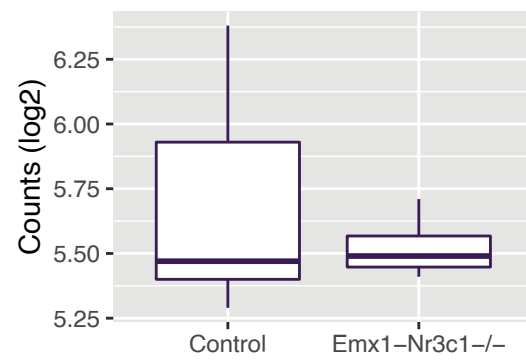**mmu-miR-574-3p**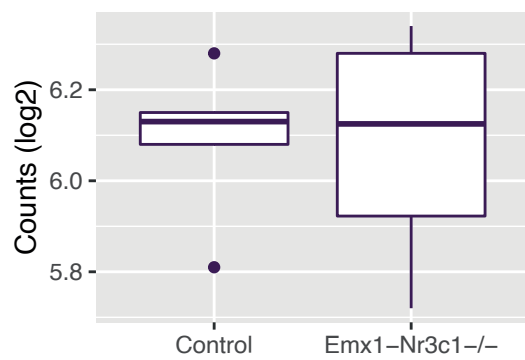**mmu-miR-146a**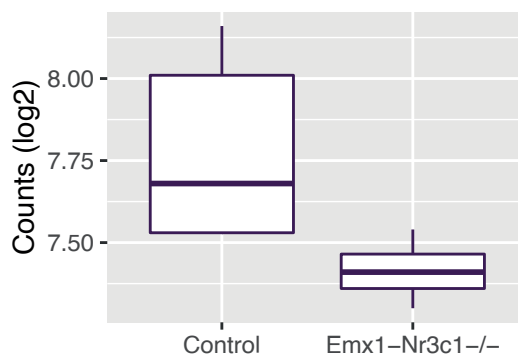**mmu-miR-126-3p**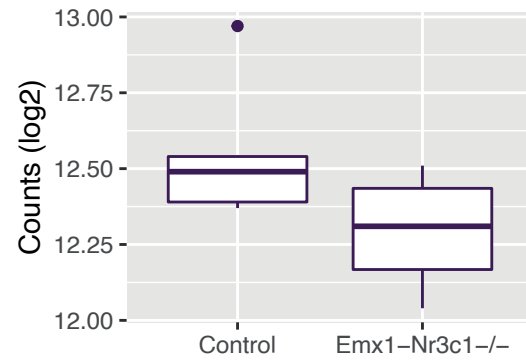**mmu-miR-218**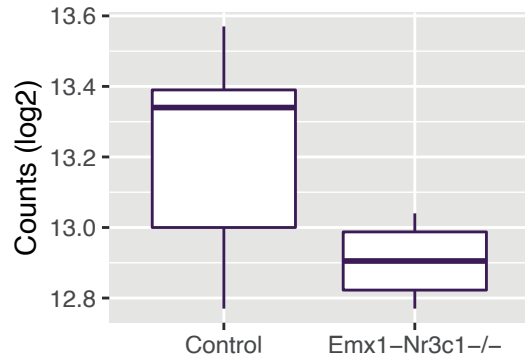**mmu-miR-133b**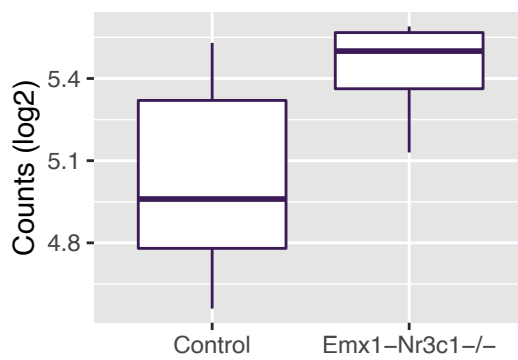**mmu-let-7e**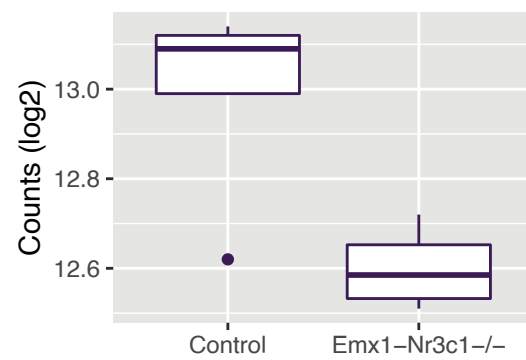

mmu-miR-2183

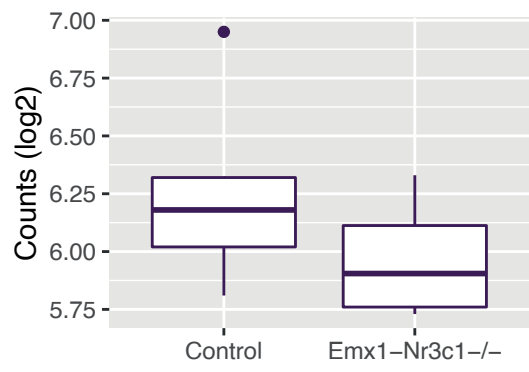

mmu-miR-34b-3p

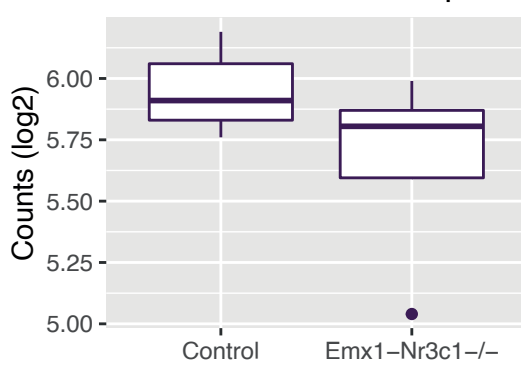

mmu-miR-34c

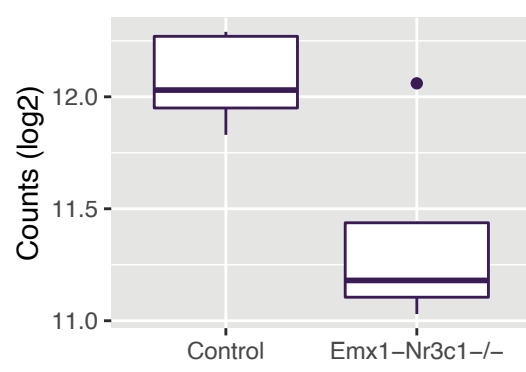

mmu-miR-673-5p

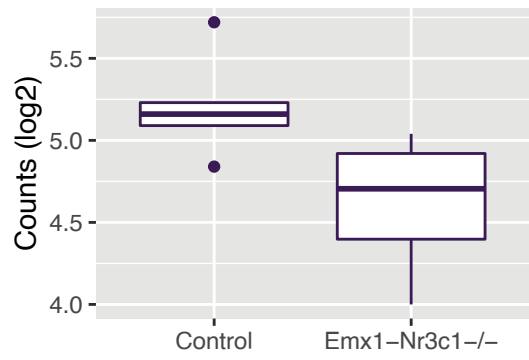

mmu-miR-582-5p

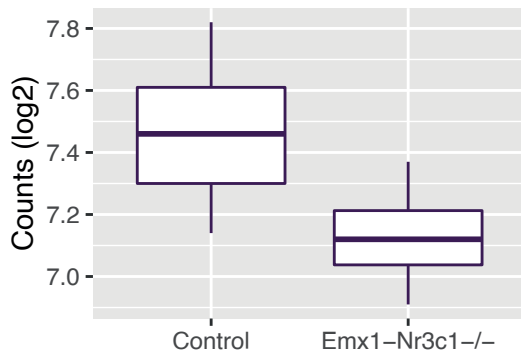

mmu-miR-199a-5p

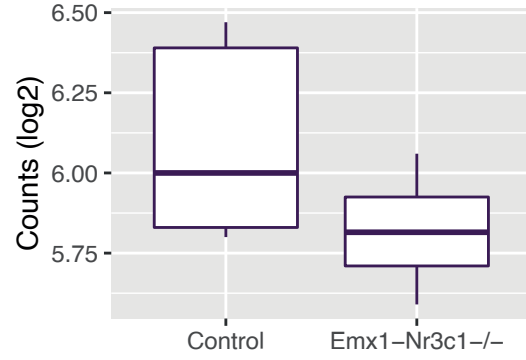

mmu-miR-205

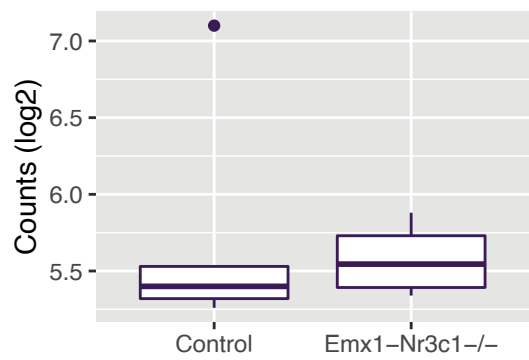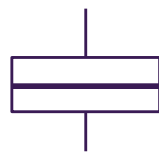

**Female NanoString Counts**

mmu-miR-190

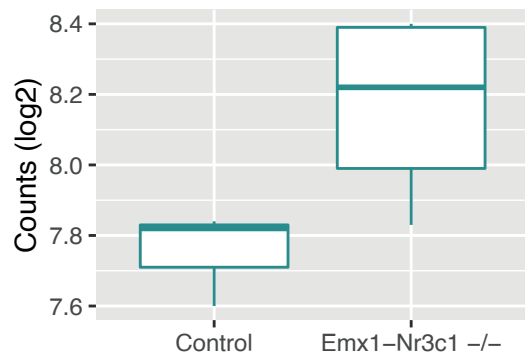

mmu-miR-3471

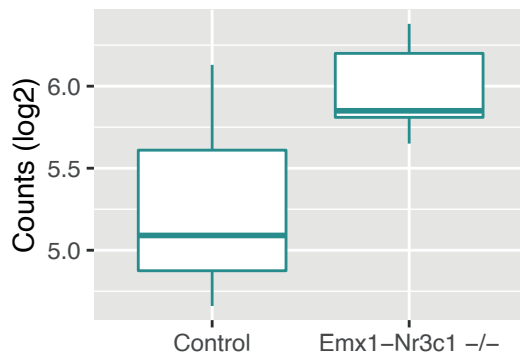

mmu-miR-804

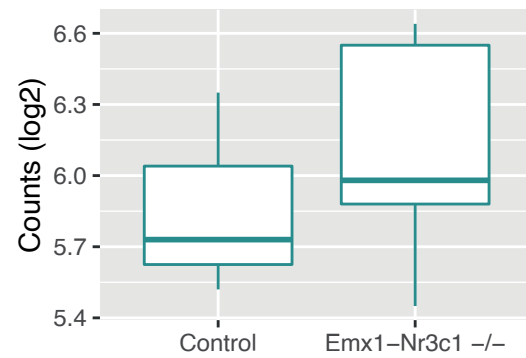

mmu-miR-224

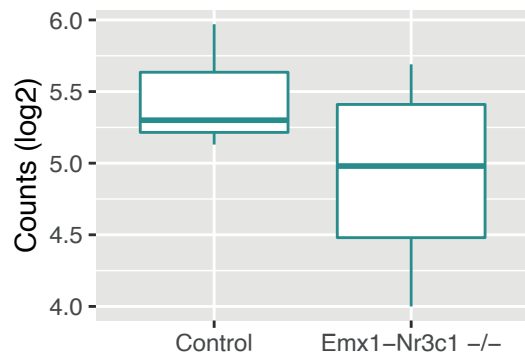

mmu-miR-143

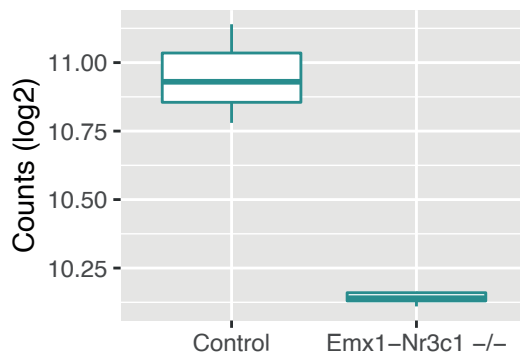

mmu-miR-145

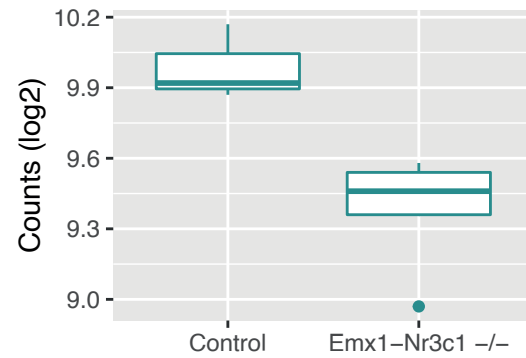

mmu-miR-1224

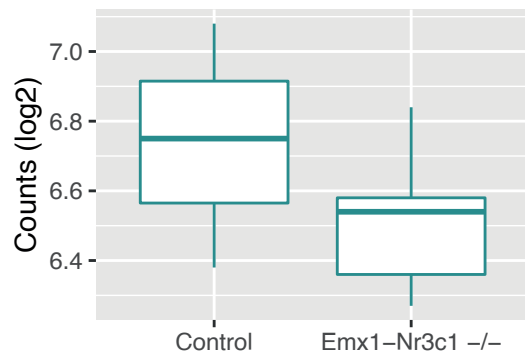

mmu-miR-323-3p

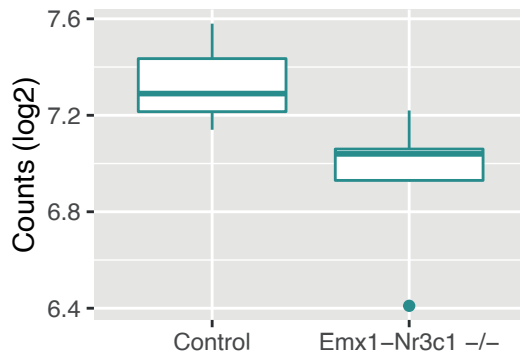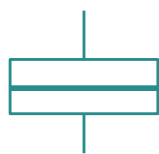

**Male NanoString Counts**
