# Supplementary material for: Deletion of hippocampal Glucocorticoid receptors unveils sex-biased microRNA expression and neuronal morphology alterations in mice
Source: PubMed Central journal article supplement — Neurobiol Stress. 2021 Feb 9;14:100306. doi: 10.1016/j.ynstr.2021.100306 (PMC7906897; doi:10.1016/j.ynstr.2021.100306), 2021-02-09
Supplement: mmc7.pdf [file mmc7.pdf]

hsa-let-7e-5p  
mmu-let-7e-5p

0 5 10 15 20

hsa-miR-1224-5p  
mmu-miR-1224-5p

0 5 10 15 20

hsa-miR-126-3p  
mmu-miR-126a-3p

0 5 10 15 20

hsa-miR-126-5p  
mmu-miR-126a-5p

0 5 10 15 20

hsa-miR-130a-3p  
mmu-miR-130a-3p

0 5 10 15 20

hsa-miR-133b  
mmu-miR-133b-3p

0 5 10 15 20

hsa-miR-136-5p  
mmu-miR-136-5p

0 5 10 15 20

hsa-miR-142-5p  
mmu-miR-142a-5p

0 5 10 15 20

hsa-miR-143-3p  
mmu-miR-143-3p

0 5 10 15 20

hsa-miR-145-5p  
mmu-miR-145a-5p

0 5 10 15 20

hsa-miR-146a-5p  
mmu-miR-146a-5p

0 5 10 15 20

hsa-miR-150-5p  
mmu-miR-150-5p

0 5 10 15 20

hsa-miR-181a-5p  
mmu-miR-181a-5p

0 5 10 15 20

hsa-miR-190a-5p  
mmu-miR-190a-5p

0 5 10 15 20

hsa-miR-199a-5p  
mmu-miR-199a-5p

0 5 10 15 20

hsa-miR-200a-3p  
mmu-miR-200a-3p

0 5 10 15 20

hsa-miR-200b-3p  
mmu-miR-200b-3p

0 5 10 15 20

hsa-miR-205-5p  
mmu-miR-205-5p

0 5 10 15 20

hsa-miR-218-5p  
mmu-miR-218-5p

0 5 10 15 20

hsa-miR-219a-5p  
mmu-miR-219a-5p

0 5 10 15 20

hsa-miR-224-5p  
mmu-miR-224-5p

0 5 10 15 20 25

hsa-miR-23a-3p  
mmu-miR-23a-3p

0 5 10 15 20

hsa-miR-26b-5p  
mmu-miR-26b-5p

0 5 10 15 20

hsa-miR-27a-3p  
mmu-miR-27a-3p

0 5 10 15 20

hsa-miR-301a-3p  
mmu-miR-301a-3p

0 5 10 15 20

hsa-miR-4499  
mmu-miR-3099-3p

0 5 10 15 20

hsa-miR-320a-3p  
mmu-miR-320-3p

0 5 10 15 20

hsa-miR-424-5p  
mmu-miR-322-5p

0 5 10 15 20

hsa-miR-323a-3p  
mmu-miR-323-3p

0 5 10 15 20

hsa-miR-34b-3p  
mmu-miR-34b-3p

0 5 10 15 20

hsa-miR-34c-5p  
mmu-miR-34c-5p

0 5 10 15 20

hsa-miR-369-5p  
mmu-miR-369-5p

0 5 10 15 20

hsa-miR-378a-3p  
mmu-miR-378a-3p

0 5 10 15 20

hsa-miR-409-5p  
mmu-miR-409-5p

0 5 10 15 20

hsa-miR-411-5p  
mmu-miR-411-5p

0 5 10 15 20

hsa-miR-425-5p  
mmu-miR-425-5p

0 5 10 15 20

hsa-miR-488-3p  
mmu-miR-488-3p

0 5 10 15 20

hsa-miR-532-3p  
mmu-miR-532-3p

0 5 10 15 20

hsa-miR-542-5p  
mmu-miR-542-5p

0 5 10 15 20 25

hsa-miR-574-3p  
mmu-miR-574-3p

0 5 10 15 20

hsa-miR-582-5p  
mmu-miR-582-5p

0 5 10 15 20

hsa-miR-297  
mmu-miR-669a-5p

0 5 10 15 20 25

hsa-miR-676-3p  
mmu-miR-676-3p

0 5 10 15 20

hsa-miR-7-5p  
mmu-miR-7a-5p

0 5 10 15 20 25

hsa-miR-875-5p  
mmu-miR-875-5p

0 5 10 15 20

hsa-miR-99a-5p  
mmu-miR-99a-5p

0 5 10 15 20
